# Supplementary material for: Effect of Saccharomyces boulardii and Bacillus subtilis B10 on gut microbiota modulation in broilers
Source: PubMed Central journal article supplement — Anim Nutr. 2018 Apr 3;4(4):358–66. doi: 10.1016/j.aninu.2018.03.004 (PMC6284224; doi:10.1016/j.aninu.2018.03.004), 2018-04-03
Supplement: mmc2.pdf [file mmc2.pdf]

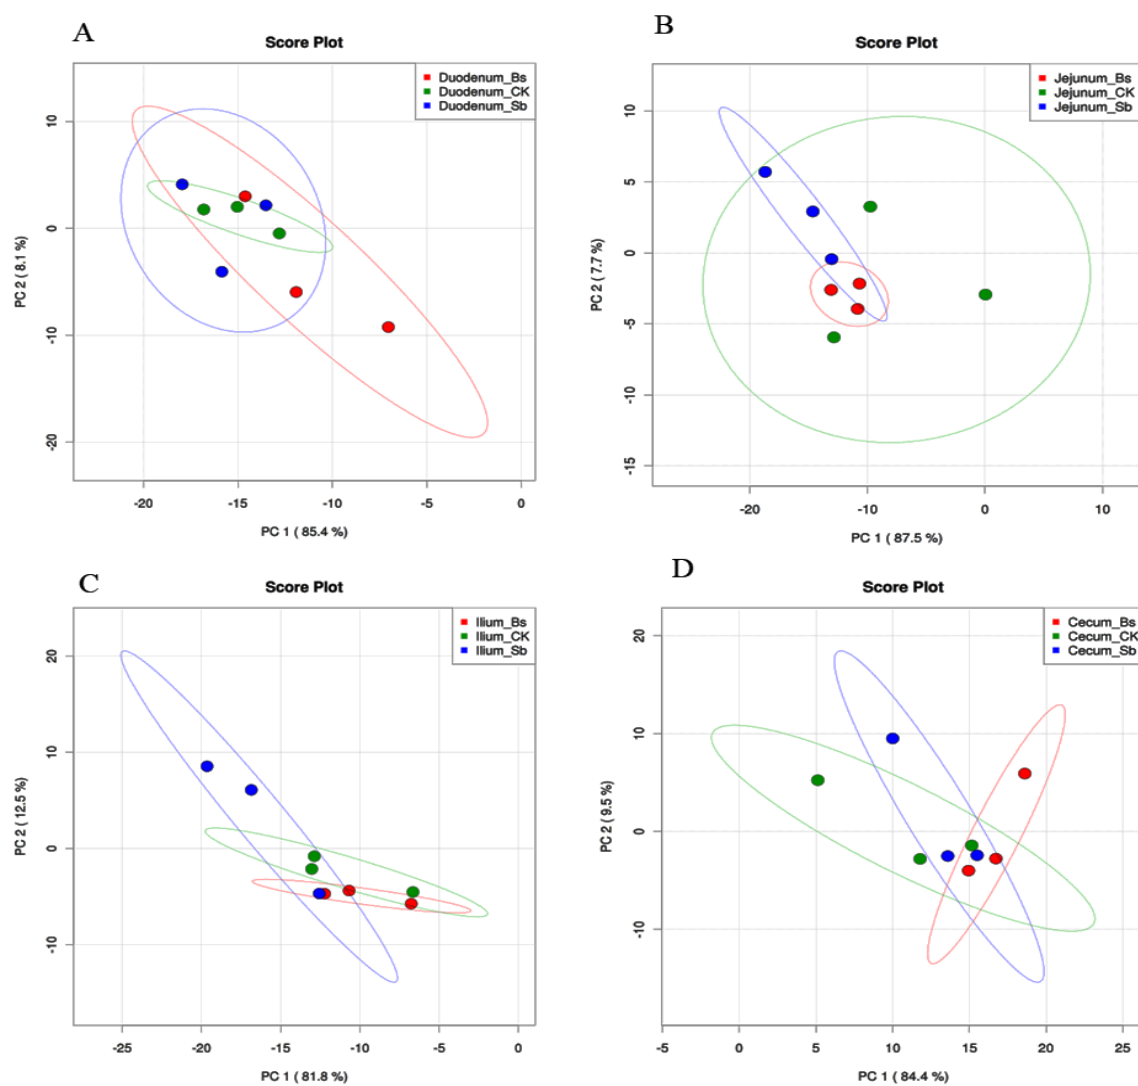

**Figure S2.** Gut microbiome sequencing data of treatments and controls analyzed by principal component analyses at phyla level (A) Duodenum, (B) Jejunum, (C) Ileum and (D) Cecum. Ck: birds fed with basal diet supplementation with virginiamycin; Bs: birds with the basal diet supplementation with *Bacillus subtilis* B10; Sb: birds fed with the basal diet supplementation with *Saccharomyces boulardii*.
