# Supplementary material for: Effect of Saccharomyces boulardii and Bacillus subtilis B10 on gut microbiota modulation in broilers
Source: PubMed Central journal article supplement — Anim Nutr. 2018 Apr 3;4(4):358–66. doi: 10.1016/j.aninu.2018.03.004 (PMC6284224; doi:10.1016/j.aninu.2018.03.004), 2018-04-03
Supplement: mmc3.pdf [file mmc3.pdf]

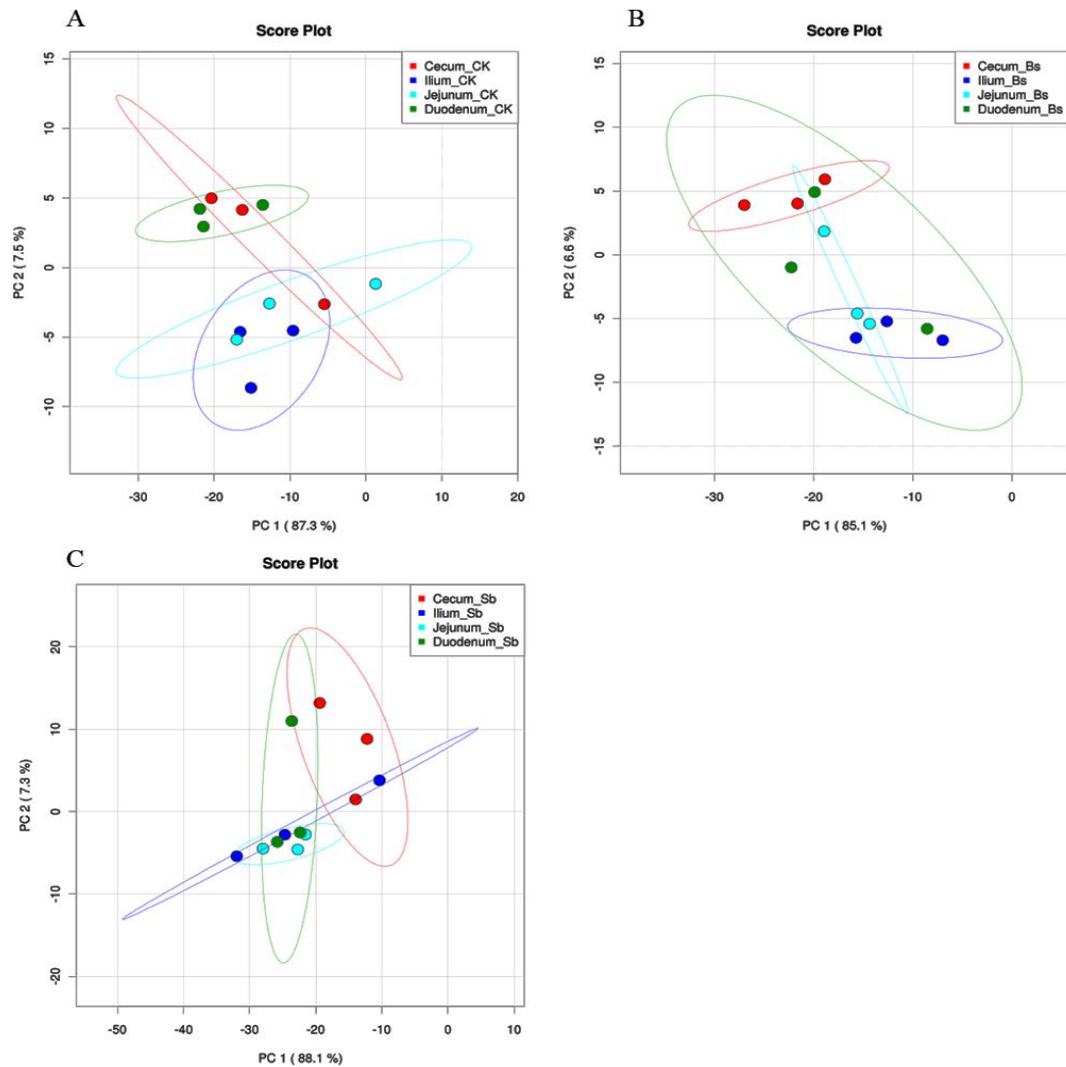

**Figure S3.** Microbial community analyzed by principal component analyses based on metabolism. (A) CK (birds fed with basal diet supplementation with virginiamycin); (B) Bs (birds with the basal diet supplementation with *Bacillus subtilis* B10) and (C) Sb (birds fed with the basal diet supplementation with *Saccharomyces boulardii*).
